# Supplementary material
Source: PubMed Central journal article supplement (PMC3612619)
Supplement: 1218091110_pnas.201218091SI.pdf [file 1218091110_pnas.201218091SI.pdf]

# Supporting Information

Murata et al. 10.1073/pnas.1218091110

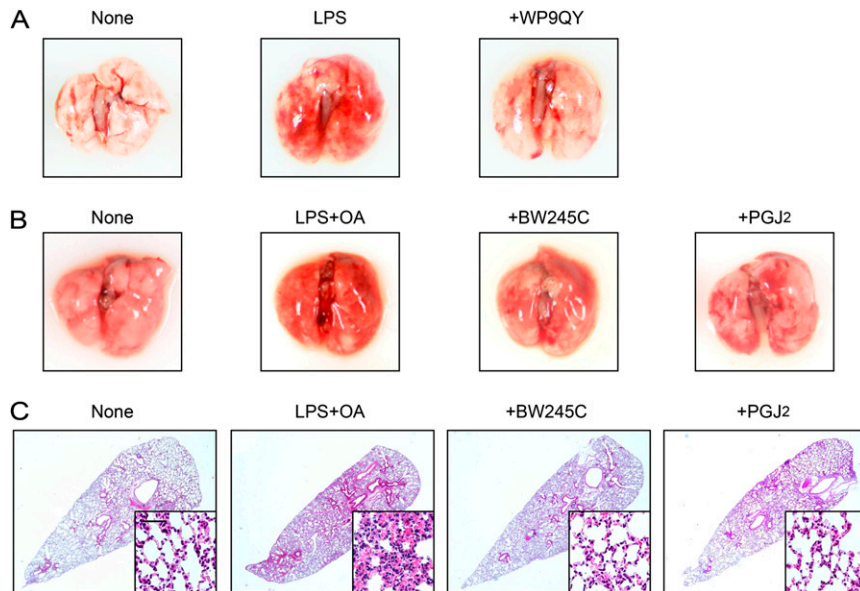

**Fig. S1.** The TNF- $\alpha$ -inhibiting peptide WP9QY (10 mg/kg every 3 h) was administered intranasally to LPS-challenged mice. The DP receptor agonist BW245C or a degraded product of prostaglandin D<sub>2</sub> (PGD<sub>2</sub>) 15d-PGJ<sub>2</sub> was administered intranasally to LPS + oleic acid (OA)-challenged mice at 100  $\mu$ g/kg 10 min before the LPS challenge. Representative pictures of dissected lung (A and B) and H&E staining (C) are shown (Scale bar in C: 100  $\mu$ m.)

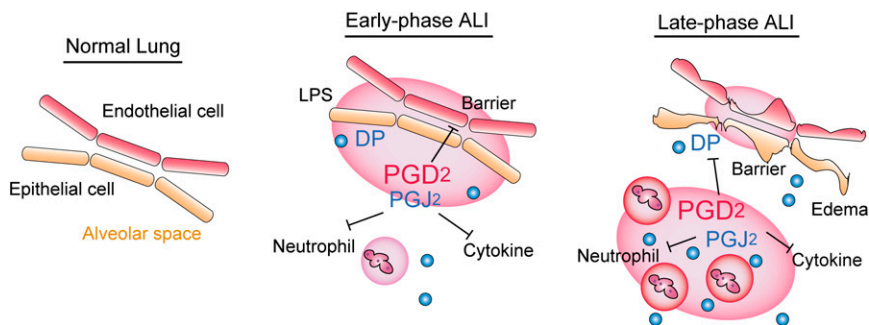

**Fig. S2.** PGD<sub>2</sub> signaling between alveolar endothelial cells/epithelial cells and neutrophils provides anti-inflammatory effects in acute lung injury.
